# Supplementary material for: Natural Infection by SARS-CoV-2 in Companion Animals: A Review of Case Reports and Current Evidence of Their Role in the Epidemiology of COVID-19
Source: PubMed Central journal article supplement (PMC7652926; doi:10.3389/fvets.2020.591216), 2020-10-27
Supplement: Data_Sheet_1.pdf [file Data_Sheet_1.pdf]

## *Supplementary Material*

- 1 Supplementary Data.** Multiple sequence alignment of protein sequences of ACE-2 (angiotensin converting enzyme 2) of human, domestic and laboratory animals, and selected wild animal species. Multiple sequence alignment was performed using Clustal Omega tool available at <https://www.ebi.ac.uk/Tools/msa/clustalo/> from the European Bioinformatics Institute (EMBL-EBI) using default parameters. In bold are highlighted conserved amino acid residues of the 22 amino acid positions of the human ACE-2 that have been identified to interact with the receptor binding domain of the SARS-CoV-2 (Severe Acute Respiratory Syndrome Coronavirus 2) (Shang et al., 2020). Accession numbers of protein sequences: NP\_001358344.1 (Human, *Homo sapiens*); NP\_001116542.1 (Pig, *Sus scrofa*); NP\_001019673.2 (Cow, *Bos taurus*); NP\_001158732.1 (Domestic dog; *Canis lupus familiaris*); NP\_001034545.1 (Domestic cat, *Felis catus*); XP\_416822.2 (Chicken; *Gallus gallus*); XP\_011961657.1 (Sheep; *Ovis aries*); XP\_003503283.1 (Chinese hamster; *Cricetulus griseus*); NP\_001123985.1 (Mice, *Mus musculus*); XP\_002719891.1 (Rabbit; *Oryctolagus cuniculus*); XP\_016798468.1 (Chimpanzee, *Pan troglodytes*); NP\_001129168.1 (Rhesus monkey; *Macaca mulatta*); NP\_001297119.1 (European domestic ferret, *Mustela putorius furo*); XP\_005074266.1 (Golden Syrian hamster, *Mesocricetus auratus*); XP\_001490241.1 (Horse, *Equus caballus*); XP\_017505752.1 (Pangolin, *Manis javanica*); XP\_032963186.1 (Greater Horseshoe bat; *Rhinolophus ferrumequinum*). Overall protein identity/similarity against human ACE-2 of Chimpanzee = 99.0%/99.4%; Rhesus monkey = 94.9%/97.5%; Golden Syrian hamster = 84.5%/91.7%; domestic cat = 81.7%/88.3%; cow = 81.0%/90.6%; sheep = 81.7%/90.8%; rabbit = 85.2%/92.8%; Chinese hamster = 84.3%/91.6%; pangolin = 84.8%/91.3%; domestic dog = 83.5%/91.8%; horse = 86.8%/93.4%; pig = 81.4%/90.7%; ferret = 82.6%/91.6%; mice = 82.1%/89.6%; greater horseshoe bat = 81.5%/90.3%; chicken = 65.6%/79.3%. Pairwise protein identities and similarities were calculated using Needleman-Wunsch algorithm from the European Bioinformatics Institute (EMBL-EBI) available at [https://www.ebi.ac.uk/Tools/psa/emboss\\_needle/](https://www.ebi.ac.uk/Tools/psa/emboss_needle/) using default parameters.

|                  |                                                                                                    |
|------------------|----------------------------------------------------------------------------------------------------|
| Homo sapiens     | MSSSSWLLLSLVAVTAAQ <b>ST</b> IEE <b>QAKTFLDKFNHEAEDLFYQSS</b> LASWNYNTNITEENVQ                     |
| Macaca mulatta   | MSGSSWLLLSLVAVTAAQ <b>ST</b> IEE <b>QAKTFLDKFNHEAEDLFYQSS</b> LASWNYNTNITEENVQ                     |
| Pan troglodytes  | MSGSSWLLLSLVAVTAAQ <b>ST</b> IEE <b>QAKTFLDKFNHEAEDLFYQSS</b> LASWNYNTNITEENVQ                     |
| Rhinolophus sp   | MSGSSWLLLSLVAVTAAQ <b>ST</b> TEDLAK <b>FLDDFNSEAENLSHQSS</b> LASWEYNTNISDENVQ                      |
| Mustela putorius | MLGSSWLLLSLAALTAQA <b>ST</b> TEDLAK <b>TFLEKFN</b> Y <b>EA</b> EELS <b>YQNS</b> LASWNYNTNITDENIQ   |
| M. auratus       | MSSSSWLLLSLVAVTTAAQ <b>S</b> IIIEE <b>QAKTFLDKFN</b> Q <b>EA</b> EDLS <b>YQ</b> SALASWNYNTNITEENAQ |
| Felis catus      | MSGSFWLLLSFAALTAQA <b>ST</b> TTEELAK <b>TFLEKFN</b> HEA <b>EELS</b> Y <b>QSS</b> LASWNYNTNITDENVQ  |
| Manis javanica   | MSGSSWLLLSLVAVTAAQ <b>ST</b> SDEEAK <b>TFLEKFN</b> SE <b>EA</b> EELS <b>YQSS</b> LASWNYNTNITDENVQ  |
| Canis lupus      | MSGSSWLLLSLAALTAQA <b>ST</b> -EDLVK <b>TFLEKFN</b> Y <b>EA</b> EELS <b>YQSS</b> LASWNYNINITDENVQ   |
| Equus caballus   | MSGSSWLLLSLVAVTAAQ <b>ST</b> TEDLAK <b>TFLEKFN</b> SE <b>EA</b> EELSH <b>QSS</b> LASWSYNTNITDENVQ  |

Supplementary Material

Sus scrofa MSGSFWLLLSLIPVTTAAQ**STTEELAKTFLEKFNLEAEDLAYQSSLASWTINTNITDENIQ**

Bos taurus MTGSFWLLLSLVAVTAAQ**STTEEQAKTFLEKFNHEAEDLSYQSSLASWNYNTNITDENVO**

Ovis aries MTGSFWLLLSLVAVTAAQ**STTEEQAKTFLEKFNHEAEDLSYQSSLASWNYNTNITDENVO**

O. cuniculus MSGSSWLLLSLVAVTAAQ**STIEELAKTFLEKFNQEAEDLSYQSALASWDYNTNITEENVO**

Mus musculus MSSSSWLLLSLVAVTTAQ**SLTEENAKTFLNFNQEAEDLSYQSSLASWNYNTNITEENAQ**

Cricetulus griseus MSSSSWLLLSLVAVTTAQ**SIIIEEQAKTFLDKFNQEAEDLSYQSALASWNYNTNITEENAQ**

Gallus gallus MLLHFWLLCGLSAVVTPQDVTQE-AQ**TFLAEFNVRAEDISYENS**LASWNYNTNITEETAR  
 \* \*\* .: :...\*. : ...\*\* \*\* \*\*: :...:\*\*\*\* \* \*\*:\*. .

Homo sapiens NMNAGDKWSAFLKEQ**STLAQMY**PLQEIQNLTVKLQALQALQNGSSVLSEDKSKRLNTIL

Macaca mulatta NMNAGEKWSAFLKEQ**STLAQMY**PLQEIQNLTVKLQALQALQNGSSVLSEDKSKRLNTIL

Pan troglodytes NMNAGDKWSAFLKEQ**STLAQMY**PLQEIQNLTVKLQALQALQNGSSVLSEDKSKRLNTIL

Rhinolophus sp KMDEAGAKWSDFYKQ**SKLAKNFS**LLEEIHNDTVKLQALQALQSGSPVLSEDKSKRLNSIL

Mustela putorius KMNIAGAKWSAFYEE**SQHAKTY**PLEEIQDPIIKRQLRALQSGSSVLADKRERLNTIL

M. auratus KMNEAAAKWSAFYEEQ**SKLAKNY**SLQEVQNLTIKRQLQALQSGSSALSADKNKQLNTIL

Felis catus KMNEAGAKWSAFYEEQ**SKLAKTY**PLAEIHNTTVKRQLQALQSGSSVLADKSKRLNTIL

Manis javanica KMNVAGAKWSTFYEEQ**SKIAKNY**QLQNIQNNTIKRQLQALQSGSSALSADKNQRLNTIL

Canis lupus KMNAGAKWSAFYEEQ**SKLAKTY**PLEEIQDSTVKRQLRALQSGSSVLADKNQRLNTIL

Equus caballus KMNEAGARWSAFYEEQ**CKLAKTY**PLEEIQNLTVKRQLQALQSGSSVLADKSKRLNEIL

Sus scrofa KMNDARAKWSAFYEEQ**SRIAKTY**PLDEIQTLLIKRQLQALQSGTSGLSADKSKRLNTIL

Bos taurus KMNEARAKWSAFYEEQ**SRMAKTY**SLEEIQNLTIKRQLKALQSGTSALSADKSKRLNTIL

Ovis aries KMNEARAKWSAFYEEQ**SRMARTY**SLEEIQNLTIKRQLKALQSGTSVLSADKSKRLNTIL

O. cuniculus KMNDAEAKWSAFYEEQ**SKLAKTY**PSQEVQNLTVKRQLQALQSGSSALSADKSKQLNTIL

Mus musculus KMSEAAAKWSAFYEEQ**SKTAQ**SFSLQEIQTPIIKRQLQALQSGSSALSADKNKQLNTIL

Cricetulus griseus KMNEAAAKWSAFYEEQ**SKLAKNY**SLQEVQNLI IKRQLQALQSGSSALSADKNKQLNTIL

Gallus gallus KMSEAGAKWAAFYEE**ASRNASR**FLANIQDAVTRLQIQSLQDRGSSVLSPEKYSRLNSVM  
 :\*. \* .\*: \* :: . \* : ::: . \*: . \*\* \*: . \*\* :\* .\*\* ::

Homo sapiens NTMSTIYSTGKVCNPDPQ**EC**LLLEPGLNEIMANSLDYNERLWAWESWRSEVKGQLRPLY

Macaca mulatta NTMSTIYSTGKVCNPN**PQ**ECLLLDPLNEIMEKSLDYNERLWAWEGWRSEVKGQLRPLY

|                    |                                                               |
|--------------------|---------------------------------------------------------------|
| Pan troglodytes    | NTMSAIYSTGKVCNPNNPQECLLLEPGLNEIMANSLDYNERLWAWESWRSEVKGQLRPLY  |
| Rhinolophus sp     | NAMSTIYSTGKVCNPNNPQECLLLEPGLDNIMETSKDYNERLWAWEGWRAEVKGQLRPLY  |
| Mustela putorius   | NAMSTIYSTGKACNPNNPQECLLLEPGLDDIMENSKDYNERLWAWEGWRSEVKGQLRPLY  |
| M. auratus         | NTMSTIYSTGKVCNPKNPQECLLLEPGLDDIMATSTDYNERLWAWEGWRAEVKGQLRPLY  |
| Felis catus        | NAMSTIYSTGKACNPNNPQECLLLEPGLDDIMENSKDYNERLWAWEGWRAEVKGQLRPLY  |
| Manis javanica     | NTMSTIYSTGKVCNPGNPQECSLLEPGLDNIMESSKDYNERLWAWEGWRSEVKGQLRPLY  |
| Canis lupus        | NSMSTVYSTGKACNPSNPQECLLLEPGLDDIMENSKDYNERLWAWEGWRSEVKGQLRPLY  |
| Equus caballus     | NTMSTIYSTGKVCNPSNPQECLLLEPGLDAIMENSKDYNQRLWAWEGWRSEVKGQLRPLY  |
| Sus scrofa         | NTMSTIYSSGKVLDPNPNPQECLVLEPGLDEIMENSKDYSRRLWAWESWRAEVKGQLRPLY |
| Bos taurus         | NKMSTIYSTGKVLDP-NTQECLALEPGLDDIMENSRDYNRRLWAWEGWRAEVKGQLRPLY  |
| Ovis aries         | NKMSTIYSTGKVLDP-NTQECLALEPGLDDIMENSRDYNRRLWAWEGWRAEVKGQLRPLY  |
| O. cuniculus       | STMSTIYSTGKVCNQSNPQECLFLEPGLDEIMAKSTDYNERLWAWEGWRSVVGKQLRPLY  |
| Mus musculus       | NTMSTIYSTGKVCNPKNPQECLLLEPGLDEIMATSTDYNSRLWAWEGWRAEVKGQLRPLY  |
| Cricetulus griseus | NTMSTIYSTGKVCNPKNPQECLLLEPGLDDIMATSTDYNERLWAWEGWRAEVKGQLRPLY  |
| Gallus gallus      | NSMSTIYSTGVVCKATEPFDCLVLEPGLDDIMANSIDYHERLWAWEGWRADVGRMMRPLY  |
|                    | . **::**:* . . :. :* *:***: ** .* ** *****.**: **: :****      |
| Homo sapiens       | EEYVVLKNEMARANHYEDYGDYWRGDYEVNGVDGYDYSRQLIEDVEHTFEEIKPLYEHL   |
| Macaca mulatta     | EEYVVLKNEMAGANHYKDYGDYWRGDYEVNGVDGYDNNRDQLIEDVERTFEEIKPLYEHL  |
| Pan troglodytes    | EEYVVLKNEMARANHYEDYGDYWRGDYEVNGVDGYDYSRQLIEDVEHTFEEIKPLYEHL   |
| Rhinolophus sp     | EEYVVLKNEMARGYHYEDYGDYWRDYETEGSPDLEYSRDQLIKDVERIFAEIKPLYEQL   |
| Mustela putorius   | EEYVALKNEMARANNYEDYGDYWRGDYEEEWADGYSYSRNQLIEDVEHTFTQIKPLYEHL  |
| M. auratus         | EEYVVLKNEMARANNYEDYGDYWRGDYEAEGADGYNNGNQLIEDVERTFKEIKPLYEQL   |
| Felis catus        | EEYVALKNEMARANNYEDYGDYWRGDYEEEWTDGYNYSRSQLIKDVEHTFTQIKPLYQHL  |
| Manis javanica     | EEYVVLKNEMARANHYEDYGDYWRGDYEAEGANGYNYSRDHLIEDVEHIFTQIKPLYEHL  |
| Canis lupus        | EEYVALKNEMARANNYEDYGDYWRGDYEEEWENGYNYSRNQLIDDVELTFTQIMPLYQHL  |
| Equus caballus     | EEYVVLKNEMARANNYEDYGDYWRGDYEAEGPSGYDYSRDQLIEDVERTFAEIKPLYEHL  |
| Sus scrofa         | EEYVVLKNEMARANNYEDYGDYWRGDYEVGTGDYDYSRNQLMEDVERTFAEIKPLYEHL   |
| Bos taurus         | EEYVVLKNEMARANNYEDYGDYWRGDYEVGTGAGDYDYSRDQLMKDVERTFAEIKPLYEQL |
| Ovis aries         | EEYVVLKNEMARANNYEDYGDYWRGDYEVGTGAGDYDYSRDQLMKDVERTFEEIKPLYEQL |

Supplementary Material

|                    |                                                                       |
|--------------------|-----------------------------------------------------------------------|
| O. cuniculus       | EEYVVLKNEMARANNYEDYGDYWRADYEAEGADGYDYSRSQLIDDVERTFSEIKPLYEQL          |
| Mus musculus       | EEYVVLKNEMARANNYNDYGDYWRGDYEAEGADGYNYNRNQLIEDVERTFAEIKPLYEHL          |
| Cricetulus griseus | EEYVVLKNEMARANNYKDYGDYWRGDYEAEGADGYNYNGNQLIEDVERTFKEIKPLYEQL          |
| Gallus gallus      | EEYVELKNEAARLNNYSYGDYWRANYETDYPEEYKYSRDQLVQDVEKTFEIQIKPLYQHL          |
|                    | **** *:** * :*.***** :** . . .:*.*** * :* ****:*                      |
| Homo sapiens       | HAYVRAKLMNAYPS-YISPIGCLPAHLLGDMWGRFWTNLYSLTVPFQKPNIDVTDAMVD           |
| Macaca mulatta     | HAYVRAKLMNAYPS-YISPTGCLPAHLLGDMWGRFWTNLYSLTVPFQKPNIDVTDAMVN           |
| Pan troglodytes    | HAYVRAKLMNAYPS-YISPIGCLPAHLLGDMWGRFWTNLYSLTVPFQKPNIDVTDAMVD           |
| Rhinolophus sp     | HAYVRTKLMPTYPS-HISPTGCLPAHLLGDMWGRFWTNLYPLTVPFQKPNIDVTDAMLN           |
| Mustela putorius   | HAYVRAKLMDAYPS-RISPTGCLPAHLLGDMWGRFWTNLYPLMVPFRQKPNIDVTDAMVN          |
| M. auratus         | HAYVRTKLMNTYPS-YISPTGCLPAHLLGDMWGRFWTNLYPLTVPFQKPNIDVTDAMVN           |
| Felis catus        | HAYVRAKLMPTYPS-RISPTGCLPAHLLGDMWGRFWTNLYPLTVPFQKPNIDVTDAMVN           |
| Manis javanica     | HAYVRAKLMNYPS-HISPTGCLPAHLLGDMWGRFWTNLYPLTVPFRQKPNIDVTDAMVN           |
| Canis lupus        | HAYVRTKLMPTYPS-YISPTGCLPAHLLGDMWGRFWTNLYPLTVPFQKPNIDVTNAMVN           |
| Equus caballus     | HAYVRAKLMPTYPS-HINPTGCLPAHLLGDMWGRFWTNLYSLTVPFQKPNIDVTDAMVD           |
| Sus scrofa         | HAYVRAKLMDAYPS-RISPTGCLPAHLLGDMWGRFWTNLYPLTVPFGEKPSIDVTEAMVN          |
| Bos taurus         | HAYVRAKLMHTYPS-YISPTGCLPAHLLGDMWGRFWTNLYSLTVPFQKPSIDVTEKMN            |
| Ovis aries         | HAYVRAKLMPTYPS-YISPTGCLPAHLLGDMWGRFWTNLYSLTVPFQKPSIDVTEKMN            |
| O. cuniculus       | HAFVRTKLMDAYPS-RISPTGCLPAHLLGDMWGRFWTNLYSLTVPFQKPNIDVTDAMVN           |
| Mus musculus       | HAYVRRKLMPTYPS-YISPTGCLPAHLLGDMWGRFWTNLYPLTVPFAQKPNIDVTDAMMN          |
| Cricetulus griseus | HAYVRTKLMPTYPS-YISPTGCLPAHLLGDMWGRFWTNLYPLTVPFQKPNIDVTDAMVN           |
| Gallus gallus      | HAYVRHRLEQVYGSELINPTGCLPAHLLGDMWGRFWTNLYNLTVPYPEKPNIDVTSAMAQ          |
|                    | **:** .* * *. * ***** * **: *.****. * :                               |
| Homo sapiens       | QAWDAQRIFKEAEKFFVSVGLPNMTQGFWENSMLTDPGNVQKAVCHPTAWDLK <b>KGDFRIL</b>  |
| Macaca mulatta     | QAWNAQRIFKEAEKFFVSVGLPNMTQGFWENSMLTDPGNVQKVCHPTAWDLK <b>KGDFRII</b>   |
| Pan troglodytes    | QAWDAQRIFKEAEKFFVSVGLPNMTQGFWENSMLTDPGNVQKAVCHPTAWDLK <b>KGDFRIL</b>  |
| Rhinolophus sp     | QNWDAKRIFKEAEKFFVSIPLNMTEGFWNSMLTDPGDGRKVVCHPTAWDLK <b>KGDFRIK</b>    |
| Mustela putorius   | QSWDARRIFEEAETFFVSVGLPNMTEGFWQNSMLTEPGDNRRKVVCHPTAWDLK <b>KRDFRIK</b> |

|                    |                                                                                |
|--------------------|--------------------------------------------------------------------------------|
| M. auratus         | QGWNAERIFKEAEKFFVSVGLPYMT <b>QGFWEN</b> SMLTDPGDDRKVVCHPTAWDLG <b>KGDFRIK</b>  |
| Felis catus        | QSWDARRIFKEAEKFFVSVGLPNMT <b>QGFWEN</b> SMLTEPGDSRKVVCHPTAWDLG <b>KGDFRIK</b>  |
| Manis javanica     | QTDANRIFKEAEKFFVSVGLPKMT <b>QTFWEN</b> SMLTEPGDGRKVVCHPTAWDLG <b>KHDFRIK</b>   |
| Canis lupus        | QSWDARKIFKEAEKFFVSVGLPNMT <b>QEFWGN</b> SMLTEPDSRKVVCHPTAWDLG <b>KGDFRIK</b>   |
| Equus caballus     | QSWDAKRIFEEAEKFFVSVGLPNMT <b>QGFWEN</b> SMLTEPGDGRKVVCHPTAWDLG <b>KGDFRIK</b>  |
| Sus scrofa         | QSWDAIRIFEEAEKFFVSVGLPNMT <b>QGFWNN</b> SMLTEPGDGRKVVCHPTAWDLG <b>KGDFRIK</b>  |
| Bos taurus         | QSWDAERIFKEAEKFFVSVGLPNMT <b>QGFWDN</b> SMLTEPGDGRKVVCHPTAWDLG <b>KGDFRIK</b>  |
| Ovis aries         | QSWDAERIFKEAEKFFVSVGLPNMT <b>QGFWDN</b> SMLTEPGDGRKVVCHPTAWDLG <b>KGDFRIK</b>  |
| O. cuniculus       | QGWDAERIFKEAEKFFVSVGLPSMT <b>QGFWEN</b> SMLTEPGDGRKVVCHPTAWDLG <b>KGDFRIK</b>  |
| Mus musculus       | QGWDAERIFQEAEEKFFVSVGLPHMT <b>QGFWAN</b> SMLTEPADGRKVVCHPTAWDLGH <b>GDFRIK</b> |
| Cricetulus griseus | QGWDAERIFKEAEKFFVSVGLPHMT <b>QGFWGN</b> SMLTDPGDDRKVVCHPTAWDLG <b>KGDFRIK</b>  |
| Gallus gallus      | KNWDAMKIFKTAEAFFASIGLYNMT <b>EGFWTNS</b> MLTEPTDNRKVVCHPTAWDMG <b>KNDYRIK</b>  |
|                    | : *: * .*: * * *.*:.* ** : * * *****:* : .* .*****.*: **:                      |
| Homo sapiens       | MCTKVTMDDFLTAHHEMGHIQYDMAYAAQPFLLRNGANEGFHEAVGEIMSLSAATPKHLK                   |
| Macaca mulatta     | MCTKVTMDDFLTAHHEMGHIQYDMAYAAQPFLLRNGANEGFHEAVGEIMSLSAATPKHLK                   |
| Pan troglodytes    | MCTKVTMDDFLTAHHEMGHIQYDMAYAAQPFLLRNGANEGFHEAVGEIMSLSAATPKHLK                   |
| Rhinolophus sp     | MCTKVTMEDFLTAHHEMGHIQYDMAYASQPYLLRNGANEGFHEAVGEVMSLSVATPKHLK                   |
| Mustela putorius   | MCTKVTMDDFLTAHHEMGHIQYDMAYAEQPFLLRNGANEGFHEAVGEIMSLSAATPNHLK                   |
| M. auratus         | MCTKVTMDNFLTAHHEMGHIQYDMAYATQPFLLRNGANEGFHEAVGEIMSLSAATPEHLK                   |
| Felis catus        | MCTKVTMDDFLTAHHEMGHIQYDMAYAVQPFLLRNGANEGFHEAVGEIMSLSAATPNHLK                   |
| Manis javanica     | MCTKVTMDDFLTAHHEMGHIQYDMAYAMQPYLLRNGANEGFHEAVGEIMSLSAATPKHLK                   |
| Canis lupus        | MCTKVTMDDFLTAHHEMGHIQYDMAYAAQPFLLRNGANEGFHEAVGEIMSLSAATPNHLK                   |
| Equus caballus     | MCTKVTMDDFLTAHHEMGHIQYDMAYAVQPYLLRNGANEGFHEAVGEIMSLSAATPNHLK                   |
| Sus scrofa         | MCTKVTMDDFLTAHHEMGHIQYDMAYAIQPYLLRNGANEGFHEAVGEIMSLSAATPHYLK                   |
| Bos taurus         | MCTKVTMDDFLTAHHEMGHIQYDMAYAAQPYLLRNGANEGFHEAVGEIMSLSAATPHYLK                   |
| Ovis aries         | MCTKVTMDDFLTAHHEMGHIQYDMAYATQPYLLRNGANEGFHEAVGEIMSLSAATPHYLK                   |
| O. cuniculus       | MCTKVTMDNFLTAHHEMGHIQYDMAYATQPFLLRNGANEGFHEAVGEIMSLSAATPEHLK                   |
| Mus musculus       | MCTKVTMDNFLTAHHEMGHIQYDMAYARQPFLLRNGANEGFHEAVGEIMSLSAATPKHLK                   |
| Cricetulus griseus | MCTKVTMDNFLTAHHEMGHIQYDMAYATQPFLLRNGANEGFHEAVGEIMSLSAATPKHLK                   |

Supplementary Material

|                    |                                                                                                              |
|--------------------|--------------------------------------------------------------------------------------------------------------|
| Gallus gallus      | MCTKVTMDDFLTAHHEMGHIEYDMAYSVQPFLLRNGANEGFHEAVGEIMSLSAATPQHLK<br>*****:*****:*****: **.******:****.*** :**    |
| Homo sapiens       | SIGLLSPDFQEDNETEINFLLLKQALTIVGTLPFITYMLEKWRWMVFKGEIPKDQWMKKWWE                                               |
| Macaca mulatta     | SIGLLSPDFQEDNETEINFLLLKQALTIVGTLPFITYMLEKWRWMVFKGEIPKDQWMKKWWE                                               |
| Pan troglodytes    | SIGLLSPDFQEDNETEINFLLLKQALTIVGTLPFITYMLEKWRWMVFKGEIPEDQWMKKWWE                                               |
| Rhinolophus sp     | TMGLSSDFLEDNETEINFLFKQALNIVGTLPFITYMLEKWRWMVFKGEIPKEEWMKKWWE                                                 |
| Mustela putorius   | NIGLLPPDFSEDSETDINFLLLKQALTIVGTLPFITYMLEKWRWMVFKGEIPKEQWMQKWWE                                               |
| M. auratus         | SIGLLSPDFQEDNETEINFLLLKQALTIVGTLPFITYMLEKWRWMVFKGDIPKEQWMEKWWE                                               |
| Felis catus        | TIGLLSPGFSEDSETEINFLLLKQALTIVGTLPFITYMLEKWRWMVFKGEIPKEQWMQKWWE                                               |
| Manis javanica     | NIGLLPPDFYEDNETEINFLLLKQALTIVGTLPFITYMLEKWRWMVFSGQIPKEQWMKKWWE                                               |
| Canis lupus        | NIGLLPPSFFEDSETEINFLLLKQALTIVGTLPFITYMLEKWRWMVFKGEIPKDQWMKTWWE                                               |
| Equus caballus     | AIGLLPPDFYEDSETEINFLLLKQALTIVGTLPFITYMLEKWRWMVFKGEIPKEEWMKKWWE                                               |
| Sus scrofa         | ALGLLPPDFYEDSETEINFLLLKQALTIVGTLPFITYMLEKWRWMVFKGEIPKEQWMQKWWE                                               |
| Bos taurus         | ALGLLAPDFHEDNETEINFLLLKQALTIVGTLPFITYMLEKWRWMVFKGEIPKQQWMEKWWE                                               |
| Ovis aries         | ALGLLAPDFYEDNETEINFLLLKQALTIVGTLPFITYMLEKWRWMVFKGEIPKQQWMEKWWE                                               |
| O. cuniculus       | SIGLLPYDFHEDNETEINFLLLKQALTIVGTLPFITYMLEKWRWMVFKGEIPKEQWMQKWWE                                               |
| Mus musculus       | SIGLLSPDFQEDSETEINFLLLKQALTIVGTLPFITYMLEKWRWMVFRGEIPKEQWMKKWWE                                               |
| Cricetulus griseus | SIGLLPSNFHEDNETEINFLLLKQALTIVGTLPFITYMLEKWRWMVFKGDIPKEKWMEKWWE                                               |
| Gallus gallus      | SLDLLEPTFQEDEETEINFLLLKQALTIVGTMPIFYMLEKWRWMVFNGEITKQEWTKRWWK<br>:.* * **.*:****:****.****:***** *:*.:*: * : |
| Homo sapiens       | MKREIVGVVEPVPHEDETYCDPASLFHVSNDYSFIRYYTRTLYQFQFQEALCQAAKHEGPL                                                |
| Macaca mulatta     | MKREIVGVVEPVPHEDETYCDPASLFHVSNDYSFIRYYTRTLYQFQFQEALCQAAKHEGPL                                                |
| Pan troglodytes    | MKREIVGVVEPVPHEDETYCDPASLFHVSNDYSFIRYYTRTLYQFQFQEALCQAAKHEGPL                                                |
| Rhinolophus sp     | MKRKIVGVVEPVPHEDETYCDPASLFHVANDYSFIRYYTRTIFEFQFHEALCRIAKHDGPL                                                |
| Mustela putorius   | MKRDIVGVVEPLPHDETYCDPAALFHVANDYSFIRYYTRTIYQFQFQEALCQIAKHEGPL                                                 |
| M. auratus         | MKREIVGVVEPLPHDETYCDPAALFHVANDYSFIRYYTRTIYQFQFQEALCQAAKHDGPL                                                 |
| Felis catus        | MKREIVGVVEPVPHEDETYCDPASLFHVANDYSFIRYYTRTIYQFQFQEALCRIAKHEGPL                                                |
| Manis javanica     | MKREIVGVVEPVPHEDETYCDPASLFHVANDYSFIRYYTRTIYQFQFQEALCQTAKHEGPL                                                |

Canis lupus MKRNIVGVVEPVPHEDETYCDPASLFHVANDYSFIRYYTRTIYQFQFQEALCQIAKHEGPL  
 Equus caballus MKREIVGVVEPVPHEDETYCDPAALFHVANDYSFIRYYTRTIYQFQFQEALCQTAKHEGPL  
 Sus scrofa MKREIVGVVEPLPHDETYCDPACLFHVAEDYSFIRYYTRTIYQFQFHEALCRTAKHEGPL  
 Bos taurus MKREIVGVVEPLPHDETYCDPACLFHVAEDYSFIRYYTRTIYQFQFHEALCKTAKHEGAL  
 Ovis aries MKREIVGVVEPLPHDETYCDPACLFHVAEDYSFIRYYTRTIYQFQFHEALCKTAKHEGAL  
 O. cuniculus MKREIVGVVEPMPHDETYCDPAALFHVANDYSFIRYYTRTIYQFQFQEALCQAAQHEGPL  
 Mus musculus MKREIVGVVEPLPHDETYCDPASLFHVSNDYSFIRYYTRTIYQFQFQEALCQAAKYNGSL  
 Cricetulus griseus MKREIVGVVEPLPHDETYCDPAALFHVSNDSYFIRYYTRTIYQFQFQEALCQAAKHGDL  
 Gallus gallus MKREIVGVVEPVPHEDETYCDPAALFHVANDYSFIRYYTRTIYQFQFQEALCKAANHTGPL  
 \*\*\*.\*\*\*\*\*.\*\*\*\*\*.\*\*\*\*:;\*\*\*\*\*::\*\*\*:\*\*\*\*. \*: : \*.

Homo sapiens HKCDISNSTEAGQKLFNMLRLGKSEPWTALLENVVGAKNMNVRPLLNYFEPLFTWLKDQN Macaca  
 mulatta HKCDISNSTEAGQKLLNMLKLGSEPWTLALENVVGAKNMNVRPLLNYFEPLFTWLKDQN

Pan troglodytes HKCDISNSTEAGQKLFNMLRLGKSEPWTALLENVVGAKNMNVRPLLNYFEPLFTWLKDQN  
 Rhinolophus sp HKCDISNSTDAGEKLHQMLSVGKSQPWTSVLKDFVGSKNMDVGPLLRYFEPLYTWLTEQN  
 Mustela putorius YKCDISNSSEAGQKLHEMLSLGRSKPWTFALERVVGAKTMDVRPLLNYFEPLFTWLKEQN  
 M. auratus HKCDISNSTEAGQKLLNMLRLGKSEPWTALLENVVGARNMDVRPLLNYFEPLSVWLKEQN  
 Felis catus HKCDISNSSEAGKLLQMLTLGKSKPWTLALEHVVGKKNMNTPLLKYFEPLFTWLKEQN  
 Manis javanica HKCDISNSAEAGQKLLQMLSLGKSKPWTLALERVVGTKNMDVRPLLNYFEPLFTWLKEQN  
 Canis lupus HKCDISNSSEAGQKLEMLKLGKSKPWTYALEIVVGAKNMDVRPLLNYFEPLFTWLKEQN  
 Equus caballus HKCDISNSTEAGQKLLQMLSLGKSEPWTALALERIVGVKNMDVRPLLNYFEPLFTWLKDQN  
 Sus scrofa YKCDISNSTEAGQKLLQMLSLGKSEPWTALLENIVGVKTMVDPKLLSYFEPLFTWLKAQN  
 Bos taurus FKCDISNSTEAGQRLQMLRLGKSEPWTALLENIVGIKTMVDPKLLNYFEPLFTWLKEQN  
 Ovis aries FKCDISNSTEAGQRLQMLRLGKSEPWTALLENIVGIKTMVDPKLLNYFEPLFTWLKEQN  
 O. cuniculus HKCDISNSTEAGQKLLNMLRLGRSEPWTALLENVVGAKNMDVRPLLNYFEPLFTWLKEQN  
 Mus musculus HKCDISNSTEAGQKLLKMLSLGNSEPWTALLENVVGARNMDVDPKLLNYFQPLFDWLKEQN  
 Cricetulus griseus HKCDISNSTEAGQKLLNMLRLGKSEPWTALLENVVGARNMDVRPLLNYFEPLSVWLKEQN  
 Gallus gallus HKCDITNSTAAGGNLRQLELGLKSKPWTLALESATGEKYMNTPLLHYFEPLFNWLQKNN  
 .\*\*\*\*:\*\*\*: \*\* .\* ::\* .\* \*:\*\*\* .\*: .\* . \*:. \*\*\* \*\*:\*\* \*\* :\*

Homo sapiens KNSFVGWSTDWSPYADQSIKVRISLKSALGDKAYEWNENEMYLFRSSVAYAMRQYFLKVK

Supplementary Material

|                    |                                                                         |
|--------------------|-------------------------------------------------------------------------|
| Macaca mulatta     | KNSFVGWSTDWSPYADQSIKVRISLKSALGDKAYEWNENEMYLFRSSVAYAMRTYFLEIK            |
| Pan troglodytes    | KNSFVGWSTDWSPYADQSIKVRISLKSALGDKAYEWNENEMYLFRSSVAYAMRQYFLKVK            |
| Rhinolophus sp     | RKSFVGWNTDWSFYADQSIKVRISLKSALGDKAYEWNENEMYLFRSSVAYAMREYFLKTK            |
| Mustela putorius   | RNSFVGWNTDWSFYADQSIKVRISLKSALGDKAYEWNENEMYFFQSSIAYAMREYFSKVK            |
| M. auratus         | KNSFVGWNTDWSFYADQSIKVRISLKSALGENAYEWDNENEMYLFRASVAYAMRVYFAKNK           |
| Felis catus        | RNSFVGWNTDWRPYADQSIKVRISLKSALGDEAYEWNENEMYLFRSSVAYAMREYFSKVK            |
| Manis javanica     | KNSFVGWNTDWSFYAAQSIKVRISLKSALGDKAYEWNENEMYLFRSSVAYAMREYFSKVK            |
| Canis lupus        | RNSFVGWNTDWSFYADQSIKVRISLKSALGDKAYEWNENEMYLFRSSVAYAMRQYFSEVK            |
| Equus caballus     | KNSFVGWSTNWSFYADQSIKVRISLKSALGDKSEYEWNDENEMYLFQSSVAYAMRVYFLKAK          |
| Sus scrofa         | GNSSVWNTDWTPTYADQSIKVRISLKSALGDAYEWNENEMYLFRSSVAYAMRNYFSSAK             |
| Bos taurus         | RNSFVGWSTEWTPYSDQSIKVRISLKSALGENAYEWNENEMYLFQSSVAYAMRKYFSEAR            |
| Ovis aries         | RNSFVGWSTEWTPYSDQSIKVRISLKSALGENAYEWNENEMYLFRSSVAYAMRKYFLKER            |
| O. cuniculus       | RNSFVGWSTEWTPYADQSIKVRISLKTALGDQAYEWNENEMYLFRSSVAYAMRKYFSEVK            |
| Mus musculus       | RNSFVGWNTWSPYADQSIKVRISLKSALGANAYEWTNNEMFLFRSSVAYAMRKYFSIIK             |
| Cricetulus griseus | KNSFVGWNTDWSFYADQSIKVRISLKSALGENAYEWNENEMYLFRATVAYAMRVYFAKNK            |
| Gallus gallus      | SGRSIGWNTDWTPTYSDNAIKVRISLKAALGDDAYVWDASELFLFKSSIAYAMRKYFAKEK           |
|                    | <pre>       :*.:*:* ** : :*****:*** .* * .*::*.:*:***** ** .     </pre> |
| Homo sapiens       | NQMILFGEEDVRVANLKPRISFNFFVTAPKNVSDIIPRTEVEKAIKSRSRINDAFRLND             |
| Macaca mulatta     | HQTILFGEEDVRVADLKPRISFNFFVTAPKNVSDIIPRTEVEEAIRISRSRINDAFRLND            |
| Pan troglodytes    | NQMILFGEEDVRVANLKPRISFNFFVTAPKNVSDIIPRTEVEKAIKSRSRINDAFRLND             |
| Rhinolophus sp     | NQTILFGEEDVWVSNLKPRISFNFFVTSPRNLSDIIPRPEVEGAIRMSRSRINDAFRLDD            |
| Mustela putorius   | NQTIPFVGKDVRSVLDKPRISFNFFVTSPENMSDIIPRADVEEAIRKSRGRINDAFRLDD            |
| M. auratus         | TQTVPFVGVEDIRVSDLKPRVSNFFVTSPQNVSDIIPRNEVEEAIRLSRGRINDVFLGDD            |
| Felis catus        | NQTIPFVEDNVWVSNLKPRISFNFFVTASKNVSDIIPRSEVEEAIRMSRSRINDAFRLDD            |
| Manis javanica     | KQTIPFEDECVRVSDLKPRVSIFFVTLPKNVSAVIPRAEVEEAIRISRSRINDAFRLDD             |
| Canis lupus        | NQTIPFVEDNVWVSDLKPRISFNFSVTSPGNVSDIIPRTEVEEAIRMYRSRINDVFLRDD            |
| Equus caballus     | NQTILFGEEDVWVSDLKPRISFNFFVTSPKNASDIIPRTDVEEAIRMSRSRINDAFRLDD            |
| Sus scrofa         | NETIPFGAVDVWVSDLKPRISFNFFVTSPANMSDIIPRSDVEKAISMSRSRINDAFRLDD            |
| Bos taurus         | NETVLFGEDNVWVSDKPRISFKFFVTSPNNVSDIIPRTEVENAIRLSRDRFNDVFLQDD             |



Ovis aries NETIPFGEENVVSDKKPRISFKFFVTSPNNVSDIIPRTEVENAIRLCRDRINDAFQLDD  
O. cuniculus NQTILFGEEDVRVSDLKPRISFNFFVTAPNNVNDIIPRNEVEEAISMSRSRINDIFRLDD  
Mus musculus NQTVPFLEEDVRVSDLKPRVSFYFFVTSPQNVSDVIPRSEVEDAIRMSRGRINDVFLGND  
Cricetulus griseus TQTVLFGVEDIRVSDLKPRVSFNFFVTSPQNVSDIIPRNEVEEAIVRFSRGRINDVFLGDD  
Gallus gallus EQNVDFQVTDIHVGEETQRVSFYLTVMSPGNVSDIVPRADVEKAIRMSRGRISEAFRLDD  
: : \* :.\*.: . \*:\*\* : \*: . \* . ::\*\* :\*\* \*: \*.\*.: : \* \*\*

Homo sapiens NSLEFLGIQPTLGPNNQPPVSIWLIVFGVVMGIVVVGIVILIFTGIRDRKKKNKARSGE-  
Macaca mulatta NSLEFLGIQPTLAPPYQSPVTTWLIVFGVVMGIVVAGIVVLIIFTGIRDRKKKNQARSEE-  
Pan troglodytes NSLEFLGIQPTLGPNNQPPVSIWLIVFGVVMGIVVVGIVILIFTGIRDRKKKNKARSEE-  
Rhinolophus sp NSLEFLGIQPTLGPYQPPVTIWLIVFGVVMGVVVVGIVVLIITGIRDRRKKDQARSEE-  
Mustela putorius NSLEFLGIQPTLEPPYQPPVTIWLIVFGVVMGVVVVGIFLLIFSGIRNRKNNQARSEE-  
M. auratus NSLEFLGINPTLSPPYQPPVTIWLIIFGVVMGIVVVGIIILIFTGIKGRKKKNETKREE-  
Felis catus NSLEFLGIQPTLSPPYQPPVTIWLIVFGVVMGVVVVGIVLLIVSGIRNRKNNQARSEE-  
Manis javanica NSLEFLGIQPTLQPPYQPPVTIWLIVFGVVMGVVVVGIVVLIIFTGIRDRKKDQARSEQ-  
Canis lupus NSLEFLGIQPTPGPPYEPVVTIWLIVFGVVMGVVVVGIVLLIFSGIRNRKNDQARGEE-  
Equus caballus NTLEFLGIQPTLGPYQPPVTVWLIAFGVVMGLVVVGIVVLIATGIRGRKKKNQARSEE-  
Sus scrofa NTLEFLGIQPTLGPDEPPVTVWLIIFGVVMGLVVVGIVVLIIFTGIRDRRKKKQASSEE-  
Bos taurus NSLEFLGIQPTLGPYEPVVTIWLIIFGVVMGVVVIGIVVLIIFTGIRNRKKNQASSEE-  
Ovis aries NSLEFLGIQPTLRPPYEPVVTIWLIIFGVVMGVVVIGIVVLIIFTGIRDQRKKNQASSEE-  
O. cuniculus NSLEFVGIQPTLEPPYESPVIWLVVFGVVMGMIVIGIVVLIIFTGIKDRRQKQAKREE-  
Mus musculus NSLEFLGIHPTLEPPYQPPVTIWLIIFGVVMALVVVGIIILIVTGIKGRKKKNETKREE-  
Cricetulus griseus NSLEFLGINPTLAPPYQPPVTIWLIIFGVVMGIVVVGIVILIVTGIRARKKNNEAKREE-  
Gallus gallus NTLEFDGIVPTLATPYKPPVTIWLILFGVVMGLVIVIGIVVLIITGQRDKRKKARGRANEA  
\*:\*\* \*\* .\* .\* :.\*. \*\*: \*\*\*\*\*:.\* \*:.:\*\* :\* . .\*: :

Homo sapiens -----NPYASIDISKGENNPGFQNTDDVQTSF  
Macaca mulatta -----NPYASIDINKGENNPGFQNTDDVQTSF  
Pan troglodytes -----NPYASVDTSKGENNPGFQNTDDVQTSF  
Rhinolophus sp -----NPYSSVDLSKGENNPGFQNGDDVQTSF

## Supplementary Material

```
Mustela putorius  -----NPYASVDLSKGENNPGFQNVDDVQTSF
M. auratus       -----NPYDSVDIGKGESNAGFLSNDDAQTSE
Felis catus      -----NPYASVDLSKGENNPGFQHADDVQTSF
Manis javanica   -----NPYASVDLSKGENNPGFQNVDDVQTSF
Canis lupus      -----NPYASVDLSKGENNPGFQSGDDVQTSF
Equus caballus   -----NPYASVDLSKGENNPGFQNGDDVQTSF
Sus scrofa       -----NPYGSMDLSKGESNSGFQNGDDIQTSE
Bos taurus       -----NPYGSVDLNKGENNSGFQNIDDVQTSL
Ovis aries       -----NPYGSVDLNKGENNSGFQNTDDVQTSL
O. cuniculus     -----NPYGFVDMKGENNSGFQNSDDIQTSE
Mus musculus     -----NPYDSMDIGKGESNAGFQNSDDAQTSE
Cricetulus griseus -----NPYDSVDIGKGESNAGFQSNDDVQTSF
Gallus gallus    GSNCEVNPYD----EDGRSNKGFEQSEETQTSF

                ***      .* .* **   :: ***:
```

## 1.1 Supplementary Figure 1

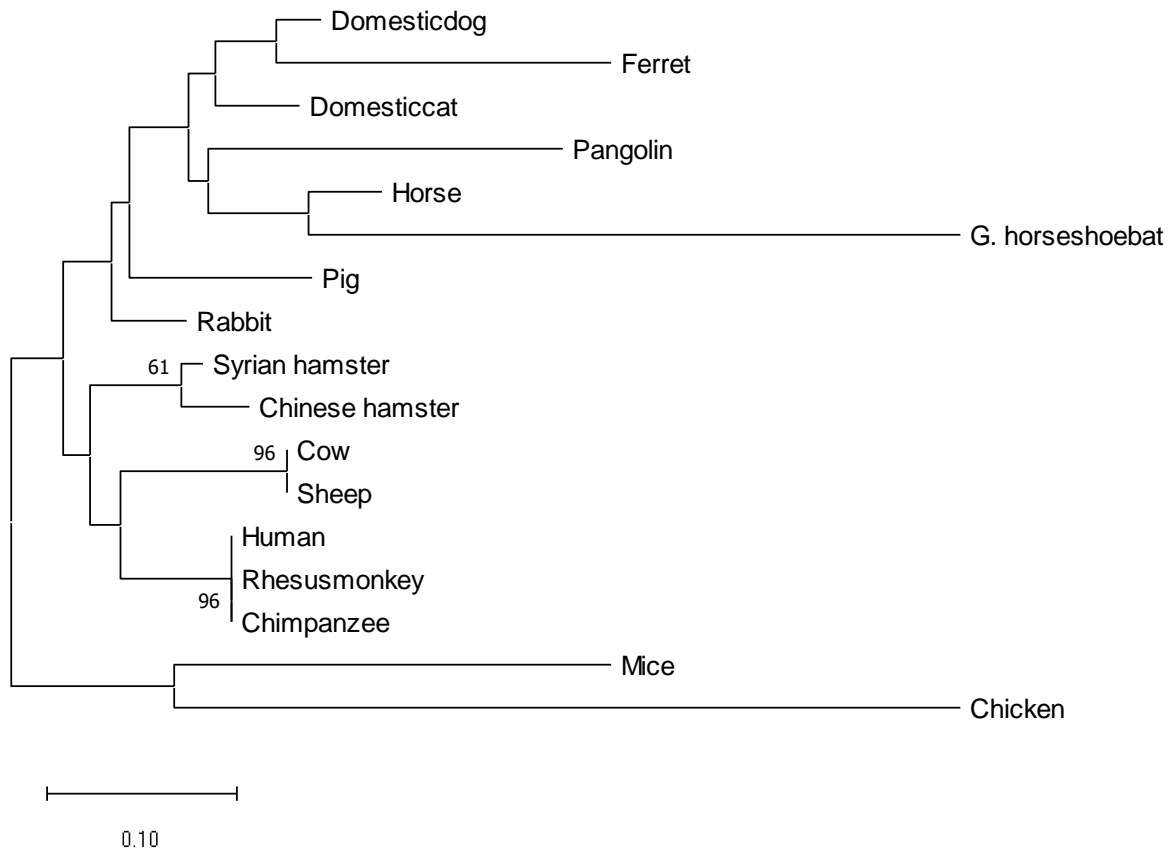

**Supplementary Figure 1.** Phylogenetic tree of the angiotensin-converting enzyme - 2 (ACE-2) protein sequence for aa positions shown in Table 1 of different animals and humans inferred using the Neighbor-Joining method. The optimal tree with the sum of branch length = 2.16064957 is shown. The percentage of replicate trees in which the associated taxa clustered together in the bootstrap test (1000 replicates) are shown next to the branches. The tree is drawn to scale, with branch lengths in the same units as those of the evolutionary distances used to infer the phylogenetic tree. The evolutionary distances were computed using the Poisson correction method and are in the units of the number of amino acid substitutions per site. This analysis involved 17 amino acid sequences. All ambiguous positions were removed for each sequence pair (pairwise deletion option). There were a total of 22 positions in the final dataset. Evolutionary analyses were conducted in MEGA X from protein sequence alignment depicted in Supplementary Data.
